# Supplementary material for: A machine-learned model for predicting weight loss success using weight change features early in treatment
Source: Springer Nature journal article supplement (doi:10.1038/s41746-024-01299-y), 2024-11-29
Supplement: MOESM1 [file 41746_2024_1299_MOESM1_ESM.pdf]

**Supplementary Information for**  
**A machine-learned model for predicting weight loss success using weight change features early in treatment**

|                               |    |
|-------------------------------|----|
| Supplementary Figure 1.....   | 2  |
| Supplementary Figure 2.....   | 3  |
| Supplementary Figure 3.....   | 4  |
| Supplementary Figure 4.....   | 5  |
| Supplementary Table 1.....    | 6  |
| Supplementary Table 2.....    | 7  |
| Supplementary Table 3.....    | 8  |
| Supplementary Table 4.....    | 9  |
| Supplementary Note 1.....     | 10 |
| Supplementary References..... | 11 |

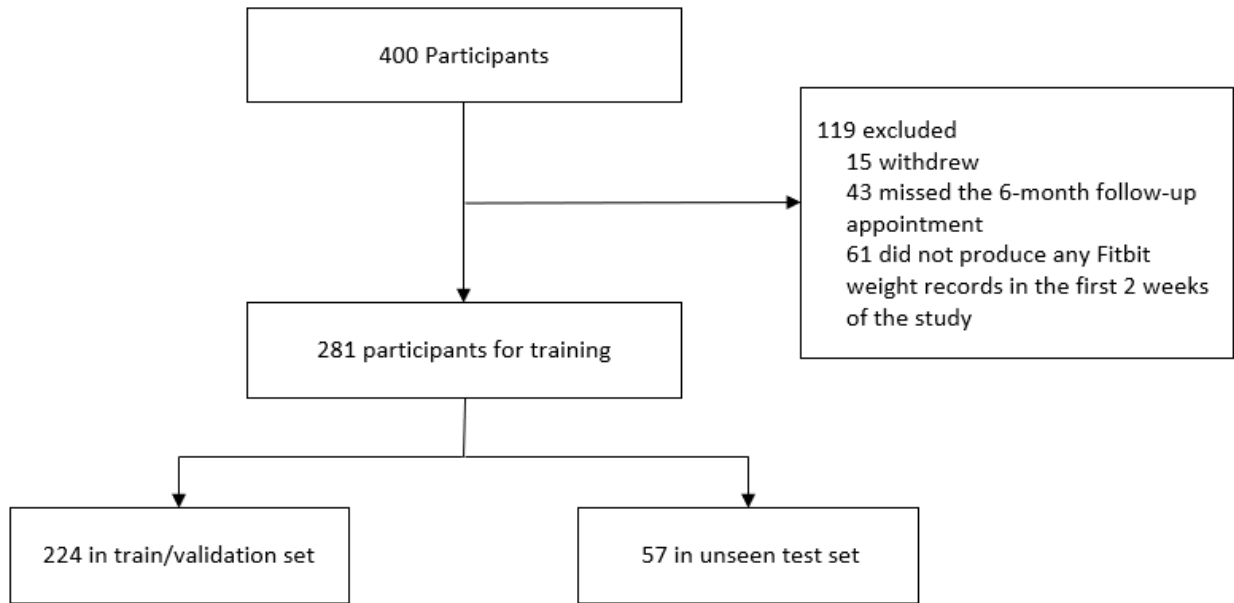

**Supplementary Figure 1: Study profile for SMART study** The figure provides a visual representation of the number of participants in the SMART Weight Management Study. It illustrates the total number of study participants, the count of individuals excluded from our analysis, and the overall number of participants considered in our analytical assessment.

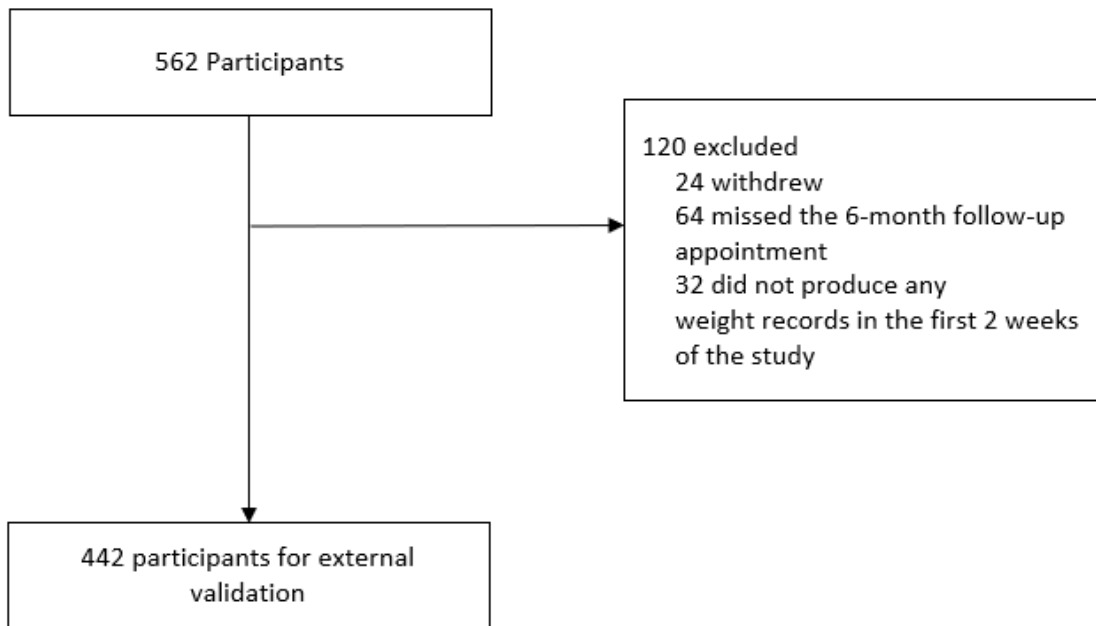

**Supplementary Figure 2: Study profile for Opt-IN study.** The figure provides a visual representation of the number of participants in the Opt-IN Weight Management Study. It illustrates the total number of study participants, the count of individuals excluded from our analysis, and the overall number of participants considered in our analytical assessment.

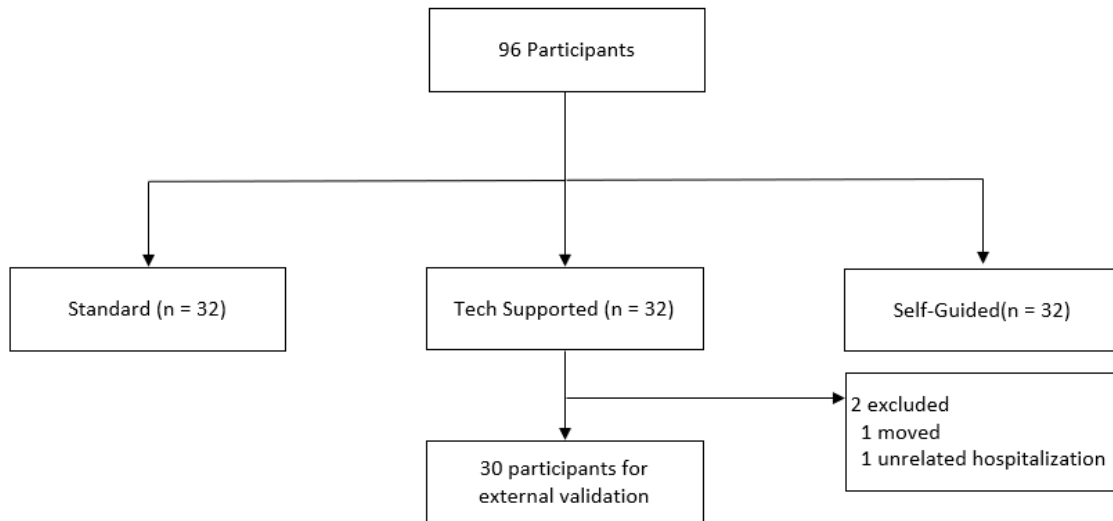

**Supplementary Figure 3: Study profile for ENGAGED study**

The figure provides a visual representation of the number of participants in the ENGAGED Weight Management Study. It illustrates the total number of study participants, the count of individuals excluded from our analysis, and the overall number of participants considered in our analytical assessment.

## Supplementary Figure 4

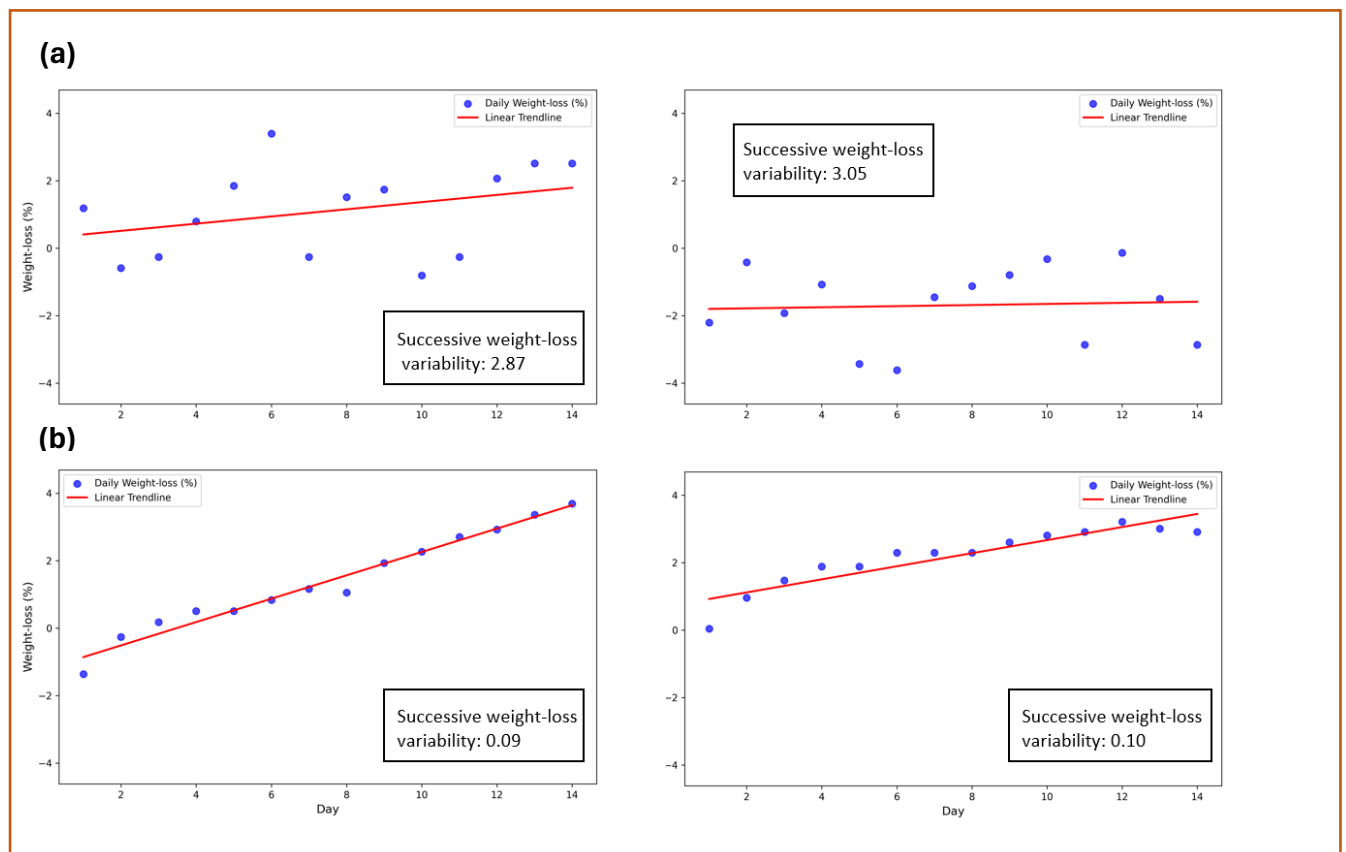

**Supplementary Figure 4: Examples of individuals with high and low weight loss variability.** This figure presents the variation in weight change over 14 days from baseline weight for four participants. Successive weight-loss variability was calculated based on the daily weight loss percentages (in blue). To better visualize the overall trend and highlight the variation in weight loss over time, a red linear trendline is superimposed on each plot. This allows for a clearer comparison of weight-loss consistency among the participants, distinguishing those with high variability from those with low variability. (A) Two individuals with high weight variability are shown, calculated using the proposed successive weight loss variability method. (B) Two individuals with low weight loss variability are presented.

| <b>Weight Variability Measures</b> | <b>Formal Operational Definition</b>                                                    | <b>Derivation</b>                                                                                                                                          | <b>Domain/Application</b>                                                          | <b>References</b>                                                                       |
|------------------------------------|-----------------------------------------------------------------------------------------|------------------------------------------------------------------------------------------------------------------------------------------------------------|------------------------------------------------------------------------------------|-----------------------------------------------------------------------------------------|
| Coefficient of Variation           | The standard deviation of the observed records over the average of the observed records | $CV = \frac{\sigma}{\mu}$ where:<br>$\mu$ = observed records' mean,<br>$\sigma$ = observed records' standard deviation                                     | All-cause mortality, Type 2 diabetes                                               | Nam et al., <sup>1</sup><br>Okada et al. <sup>2</sup>                                   |
| Mean Successive Variability        | The mean absolute difference between successive weight records                          | $ASV = \frac{1}{n} \sum_{i=1}^{n-1}  y_i - y_{i+1} $ where:<br>$n$ = the number of records,<br>$y_i$ = observed record                                     | Coronary disease, Diabetes, Heart failure with preserved ejection fraction (HFpEF) | Banglore et al., <sup>3</sup><br>Rhee et al., <sup>4</sup><br>Li et al. <sup>5</sup>    |
| Root Mean Squared Error            | The square root of the average of the squared residuals from linear regression method   | $RMSE = \sqrt{\frac{1}{n} \sum_{i=1}^n (y_i - \hat{y}_i)^2}$ where:<br>$y_i$ = observed record,<br>$\hat{y}_i$ = fitted record,<br>$n$ = number of records | Long-term weight-loss success, Cardiovascular, All-cause mortality                 | Benson et al., <sup>6</sup><br>Cologne et al., <sup>7</sup><br>Dyer et al. <sup>8</sup> |
| Non-linear Mean Deviation          | The average of the absolute residuals error from LOESS regression method                | $NLMD = \frac{1}{n} \sum_{i=1}^n  y_i - \hat{y}_i $ where:<br>$y_i$ = observed record,<br>$\hat{y}_i$ = fitted record                                      | Weight-loss maintenance                                                            | Turicchi et al. <sup>9</sup>                                                            |

**Supplementary Table 1: Descriptions of Body Weight Variability Operational Definitions in Difference Studies**

| ML Model            | Sensitivity      | Specificity      | F1-score<br>(6-month<br>weight-loss<br>success) | F1-score<br>(suboptimal 6-month<br>weight-loss) | F1 weighted      | ROC-AUC          | Balanced Accuracy |
|---------------------|------------------|------------------|-------------------------------------------------|-------------------------------------------------|------------------|------------------|-------------------|
| k-NN                | 0.364            | 0.714            | 0.400                                           | 0.676                                           | 0.569            | 0.519            | 0.539             |
| Logistic Regression | 0.318            | 0.914            | 0.438                                           | 0.780                                           | 0.648            | 0.684            | 0.616             |
| Naïve Bayes         | 0.455            | 0.743            | 0.488                                           | 0.712                                           | 0.626            | 0.701            | 0.599             |
| Random Forest       | 0.409            | 0.714            | 0.439                                           | 0.685                                           | 0.590            | 0.652            | 0.562             |
| SVM                 | 0.273            | 0.714            | 0.316                                           | 0.658                                           | 0.526            | 0.497            | 0.494             |
| Gradient Boosting   | 0.227            | 0.886            | 0.323                                           | 0.747                                           | 0.583            | 0.713            | 0.556             |
| Mean (STD)          | 0.341<br>(0.085) | 0.781<br>(0.093) | 0.401<br>(0.069)                                | 0.710<br>(0.046)                                | 0.590<br>(0.043) | 0.628<br>(0.095) | 0.561<br>(0.044)  |

**Supplementary Table 2: Performance of ML Models at Baseline**

We conducted training and testing of both discriminative and generative models, utilizing static features such as psychological and demographic attributes collected at the baseline. This table provides an overview of the baseline results. Notably, the Logistic Regression algorithm demonstrated F1 weighted scores of 64.8% and balanced accuracy of 61.6%. In general, the machine learning models trained at baseline exhibited an average F1 weighted score of 59.0% with a standard deviation of 4.3%.

| ML Model            | Sensitivity      | Specificity      | F1-score<br>(6-month weight-loss success) | F1-score<br>(suboptimal 6-month weight-loss) | F1 weighted      | ROC-AUC          | Balanced Accuracy |
|---------------------|------------------|------------------|-------------------------------------------|----------------------------------------------|------------------|------------------|-------------------|
| k-NN                | 0.318            | 0.914            | 0.438                                     | 0.780                                        | 0.648            | 0.741            | 0.616             |
| Logistic Regression | 0.545            | 0.886            | 0.632                                     | 0.816                                        | 0.745            | 0.795            | 0.716             |
| Naïve Bayes         | 0.773            | 0.743            | 0.708                                     | 0.788                                        | 0.757            | 0.842            | 0.758             |
| Random Forest       | 0.818            | 0.714            | 0.720                                     | 0.781                                        | 0.758            | 0.845            | 0.766             |
| SVM                 | 0.318            | 0.714            | 0.359                                     | 0.667                                        | 0.548            | 0.531            | 0.516             |
| Gradient Boosting   | 0.409            | 0.886            | 0.514                                     | 0.785                                        | 0.680            | 0.808            | 0.647             |
| Mean (STD)          | 0.530<br>(0.222) | 0.810<br>(0.095) | 0.562<br>(0.148)                          | 0.770<br>(0.052)                             | 0.689<br>(0.083) | 0.760<br>(0.118) | 0.670<br>(0.096)  |

**Supplementary Table 3: Performance of ML Models by Week 2**

In this table, we present the predictive performance of our machine learning models, utilizing both dynamic features gathered during the two-week treatment period and static features obtained at baseline. The Random Forest model stands out with the highest F1 weighted score of 75.8% and balanced accuracy of 76.6%. On average, we attain an F1 weighted score of 68.9% with a standard deviation of 8.3% implying a 9.9% improvement overall using the dynamic features obtained from the two-week weight loss trajectory.

| <b>Variable</b>                                         | <b>Feature Description</b>                                                                                          |
|---------------------------------------------------------|---------------------------------------------------------------------------------------------------------------------|
| <i>Statistical Features</i>                             |                                                                                                                     |
| Mean                                                    | Average weight loss from a two-week weight trajectory                                                               |
| Variance                                                | Variance of the weight loss from a two-week weight trajectory                                                       |
| Median                                                  | Median of the weight loss from a two-week weight trajectory                                                         |
| Maximum                                                 | Maximum weight loss from a two-week weight trajectory                                                               |
| Minimum                                                 | Minimum weight loss from a two-week weight trajectory                                                               |
| 75 <sup>th</sup> Percentile                             | 75 <sup>th</sup> percentile weight loss from a two-week weight trajectory                                           |
| 25 <sup>th</sup> Percentile                             | 25 <sup>th</sup> percentile weight loss from a two-week weight trajectory                                           |
| Range                                                   | Range of weight loss from a two-week weight trajectory                                                              |
| Inter-quartile range                                    | Distance between 75 <sup>th</sup> percentile and 25 <sup>th</sup> percentile                                        |
| Slope                                                   | Slope obtained from the best-fitted regression line for the two-week weight trajectory                              |
| Intercept                                               | Intercept obtained from the best-fitted regression line for the two-week weight trajectory                          |
| Zero-crossing                                           | Number of times in change of sign (e.g., positive to negative) in the mean-centered two-week weight loss trajectory |
| Kurtosis                                                | A measure to calculate whether the two-week weight loss trajectory is heavy-tailed or light-tailed                  |
| Skewness                                                | A measure to calculate the skewness of the weight loss trajectory                                                   |
| Weight loss on the 14 <sup>th</sup> day (%)             | The percent of weight loss on the 14 <sup>th</sup> day                                                              |
| Weight loss on the 7 <sup>th</sup> day (%)              | The percent of weight loss on the 7 <sup>th</sup> day                                                               |
| Sparsity-adjusted successive weight variability (SASWV) | As described in the main body of the paper                                                                          |
| <i>Baseline Features</i>                                |                                                                                                                     |
| Self-efficacy Score (diet)                              | As described in Pfammatter et al. <sup>10</sup>                                                                     |
| Self-efficacy Score (exercise)                          | As described in Pfammatter et al. <sup>10</sup>                                                                     |
| Sex                                                     | Sex                                                                                                                 |
| Race/ethnicity                                          | Combined race and ethnicity variable                                                                                |
| Age                                                     | Age                                                                                                                 |
| Height                                                  | Height                                                                                                              |
| Baseline weight (lb)                                    | Weight measured in the beginning of the study                                                                       |

**Supplementary Table 4: Feature Description Table**

In this table, we provide a detailed description of the features utilized in the machine learning models, encompassing both baseline features and statistical characteristics.

## Supplementary Note 1

### Stratified Splitting and Model Evaluation

To maintain an unbiased modeling approach, we randomly split the data into train, validation, and test sets, stratified by sex, race/ethnicity, and the outcome variable (weight loss success) to ensure diversity within each set while avoiding cross-contamination. We repeated this 60/20/20 split 15 times using different random states, with each iteration selecting distinct samples for the train, validation, and test sets while preserving the same stratification. We then compared the results (with a fixed random state) to the 95% confidence interval range for the F1 weighted score. We observed that the results consistently fell within this confidence interval, confirming that the F1 weighted score of 75.7% was within the confidence interval range (95% CI, 74.8%-77.1%).

### Supplementary References:

- 1 Nam, G. E. *et al.* Impact of body mass index and body weight variabilities on mortality: a nationwide cohort study. *Int J Obes (Lond)* **43**, 412-423 (2019).
- 2 Okada, H. *et al.* Association between variability in body mass index and development of type 2 diabetes: Panasonic cohort study. *BMJ Open Diabetes Res Care* **9** (2021).
- 3 Bangalore, S. *et al.* Body-Weight Fluctuations and Outcomes in Coronary Disease. *N Engl J Med* **376**, 1332-1340 (2017).
- 4 Rhee, E. J. *et al.* Increased risk of diabetes development in individuals with weight cycling over 4 years: The Kangbuk Samsung Health study. *Diabetes Res Clin Pract* **139**, 230-238 (2018).
- 5 Li, Y. *et al.* Association of Body-Weight Fluctuation With Outcomes in Heart Failure With Preserved Ejection Fraction. *Front Cardiovasc Med* **8**, 689591 (2021).  
<https://doi.org/10.3389/fcvm.2021.689591>
- 6 Benson, L., Zhang, F., Espel-Huynh, H., Wilkinson, L. & Lowe, M. R. Weight variability during self-monitored weight loss predicts future weight loss outcome. *Int J Obes (Lond)* **44**, 1360-1367 (2020).
- 7 Cologne, J. *et al.* Association of Weight Fluctuation With Mortality in Japanese Adults. *JAMA Netw Open* **2**, e190731 (2019).
- 8 Dyer, A. R., Stamler, J. & Greenland, P. Associations of weight change and weight variability with cardiovascular and all-cause mortality in the Chicago Western Electric Company Study. *Am J Epidemiol* **152**, 324-333 (2000).
- 9 Turicchi, J. *et al.* Data Imputation and Body Weight Variability Calculation Using Linear and Nonlinear Methods in Data Collected From Digital Smart Scales: Simulation and Validation Study. *JMIR Mhealth Uhealth* **8**, e17977 (2020).
- 10 Pfammatter, A. F. *et al.* SMART: Study protocol for a sequential multiple assignment randomized controlled trial to optimize weight loss management. *Contemp Clin Trials* **82**, 36-45 (2019).
